# Supplementary material
Source: publisher figshare collection journal article supplement (https://sage.figshare.com/ndownloader/files/12753644)
Supplement: Supplementary file 1 [file 12753644]

## Sheet: Table S1
Supplementary Table 1. Organism and tissue specific discrimination factors applied to modern coyote food source δ13C and δ15N values prior to grouping sources into isotopically distinct categories.
Organism	δ13Ckeratin -muscle	δ13Ccollagen -muscle	δ13Cskin -muscle	δ15Nkeratin -muscle	δ15Ncollagen-muscle	δ15Nskin-muscle	Citation
Pinniped	-1.7 ± 0.5	-4 ± 1	-	-0.6 ± 0.4	-	-	C: Hobson et al. 1997; Newsome et al. 2004 N: Hobson et al. 1996
Reptile	-	-	-1.3 ± 0.7	-	-	-1.0 ± 0.4	C: Warne et al. 2010; N: Seminoff 2009
Bird	-0.3 ± 0.5	-	-	-0.6 ± 0.3	-	-	Hobson and Clark 1992
Rodent	-1 ± 0.2	-2.7 ± 1	-	-0.8 ± 0.4	no change	-	keratin: Miller et al. 2008; collagen: Tieszen 1983
Rabbit	no change	-	-	no change	-	-	Hilderbrand 1996
Ruminant	-1.6 ± 1	-4 ± 1	-	no change	no change	-	keratin: Codron et al. 2007; collagen: Ambrose 1993, Newsome 2004
Pig	-1.9 ± 0.5	-	-	no change	-	-	Nardoto et al. 2006

## Sheet: Table S2
Supplementary Table 2. C and N isotope values measured in modern and archaeological coyote dietary sources. Modern dietary items were adjusted to diet space by applying published organism and tissue specific discrimination factors (summarized in Supplementary Table 1) and grouped based on the similarity of their diet space isotopic values, as described in the text. Values for Holocene plants are …
Site	Species	Group	tissue sampled	diet space δ13C	std dev δ13C	[C]	diet space δ15N	std dev δ15N	[N]	n	Reference
modern	fast food beef	anthropogenic	muscle	-18	2.93		6.1	0.4		162	Jahren and Kraft, 2009
modern	fast food chicken	anthropogenic	muscle	-17.5	0.45		2.3	0.29		161	Jahren and Kraft, 2009
modern	unidentified bird	anthropogenic	feather	-14.7	NA		5.6	NA		1	Reid and Koch, 2017
modern	Anthropogenic Average	anthropogenic	-	-16.7333	0.232918	0.57	4.66667	0.491423	0.12	324
modern	unidentifed reptile	marine	skin	-18.8	NA		12.6	NA		1	Reid and Koch, 2017
modern	CA sea lion (Zalophus californianus), female	marine	bone collagen	-17.9	1.1		18.4	0.9		4	Burton and Koch, 1999
modern	CA sea lion (Zalophus californianus), male	marine	bone collagen	-17.7	0.7		18.7	1		11	Burton and Koch, 1999
modern	CA sea lion (Zalophus californianus)	marine	hair	-16.75	0.465475		15.75	0.5		4	Reid and Koch, 2017
modern	Harbor seal (Phoca vitulina)	marine	bone collagen	-16.4	0.75		18.6	1.2		18	Burton and Koch, 1999
modern	Harbor seal (Phoca vitulina)	marine	hair	-16.4613	NA		16.3541	NA		1	Reid and Koch, 2017
modern	Northern elephant seal (Mirounga angustirostris), pups	marine	hair	-19.3	0.4		15	1		37	Aurioles et al. 2006
modern	Northern elephant seal (Mirounga angustirostris)	marine	hair	-17.4	NA		12.1	NA		1	Reid and Koch, 2017
modern	Northern elephant seal (Mirounga angustirostris), female	marine	bone collagen	-18.4	0.8		18.1	1.3		14	Burton and Koch, 1999
modern	Northern elephant seal (Mirounga angustirostris), male	marine	bone collagen	-17.6	1.1		18.2	0.7		10	Burton and Koch, 1999
modern	Marine Average	marine	-	-17.3296	0.820156	0.58	16.5337	1.04392	0.1	101
modern	unidentified bird	terrestrial omnivore	feather	-23.8422	NA		11.9998	NA		1	Reid and Koch, 2017
modern	Opossum (Didelphis marsupialus)	terrestrial omnivore	hair	-23.1	NA		12	NA		1	Reid and Koch, 2017
modern	unidentified reptile	terrestrial omnivore	skin	-28.4	1.13137		11.55	0.0707107		2	Reid and Koch, 2017
modern	Pig (Sus scrofa)	terrestrial omnivore	hair	-27.2	NA		12.2	NA		1	Reid and Koch, 2017
modern	unidentified arthropod	terrestrial omnivore	chitin	-27.1	NA		9.4	NA		1	Reid and Koch, 2017
modern	Terrestrial omnivore Average	terrestrial omnivore	-	-26.3349	2.36927	0.6	11.4545	1.03816	0.1	6
modern	California mouse (Peromyscus californicus)	CA mouse	hair	-23.5367	0.686562	0.47	8.33333	1.96071	0.14	30	This study
modern	Jerusalem cricket (Stenopelmatus sp.)	terrestrial herbivore	chitin	-26.9	0.424264		3.5	3.11127		2	This study
modern	California vole (Microtus californicus)	terrestrial herbivore	collagen, hair	-27.3417	1.00404	0.47	5.58333	1.39273	0.14	12	This study
modern	Woodrat (Neotoma fuscipes)	terrestrial herbivore	hair	-26.77	0.706692		4.10333	1.21839		30	This study
modern	Black-tailed deer (Odocoileus hemionus)	terrestrial herbivore	hair	-26.8353	0.740727		4.64706	1.93265		17	This study
modern	Brush mouse (Peromyscus boylii)	terrestrial herbivore	hair	-25.0667	0.378594	0.47	3.5	1.9975	0.14	3	This study
modern	Deer mouse (Peromyscus maniculatus)	terrestrial herbivore	hair	-25.6333	0.58023		3.16	1.26141		15	This study
modern	Harvest mouse (Reithrodontomys megalotis)	terrestrial herbivore	hair	-26.0917	0.865982		4.00833	0.938527		12	This study
modern	Brush rabbit (Sylvilagus bachmani)	terrestrial herbivore	collagen, hair	-24.7714	1.44996		5.82857	0.875051		7	This study
modern	Terrestrial herbivore Average	terrestrial herbivore	-	-26.3974	1.07766	0.47	4.31629	1.5782	0.14	98
modern	manzanita berry	plant	berry	-26.575	0.590903		-4.25	0.532291		4	Reid et al. 2014
modern	coffee berry	plant	berry	-24.44	0.95551		-0.98	0.432435		5	Reid et al. 2014
modern	Berry Average	plant	-	-25.3083	1.26854	0.46	-2.43305	1.78148	0.08	9
CA-SCR-35	Northern fur seal (Callorhinus ursinus)	pinniped	collagen	-13.2663	0.115433	0.581	18.0185	0.453619	0.103	5	This study
CA-SCR-35	Black-tailed deer (Odocoileus hemionus) and elk (Cervus canadensis)	ruminant	collagen	-20.698	0.306315	0.47	4.71467	0.821697	0.141	8	5 O. hemionus, 3 C. canadensis, this study
CA-SCR-35	Rabbit (Sylvilagus sp.)	rabbit	collagen	-22.0201	0.799401	0.47	3.89516	0.958415	0.14	5	This study
CA-SCR-35	Botta's pocket gopher (Thomomys bottae)	gopher	collagen	-21.8533	0.394853	0.47	4.7	3	0.14	7	This study
CA-SCR-35	Estimated Holocene berries	plant	-	-23.5	1.3	0.46	-2.4	1.8	0.08	-
Moss Landing	Rabbit (Sylvilagus sp.) and Botta's pocket gopher (Thomomys bottae)	small mammal	collagen	-22.1	0.8	0.47	4.7	1.5	0.14	8	This study
Moss Landing	Surfperch (Embiotocidae) and Pacific hake (Merlucciidae)	marine fish	collagen	-12.436	1.27408	0.335344	14.6713	1.05236	0.115915	6	4 Embiotocidae, 2 Pacific hake, this study
Moss Landing	Northern fur seal (Callorhinus ursinus)	pinniped	collagen	-13.8	2.4	0.58	16.3	3.4	0.1	66	Burton et al. 2001; this study
Moss Landing	Black-tailed deer (Odocoileus hemionus) and elk (Cervus canadensis)	ruminant	collagen	-20.5281	0.516446	0.47	5.4	0.738635	0.14	20	9 O. hemionus, 10 C. canadensis, this study
Moss Landing	Estimated Holocene berries	plant	-	-23.5	1.3	0.46	-2.4	1.8	0.08	-
CA-SLO-239	Sea otter (Enyhdra lutris)	sea otter	collagen	-12.06	1.12495	0.581	13.74	0.692185	0.103	2	This study
CA-SLO-239	Black-tailed deer (Odocoileus hemionus)	ungulate	collagen	-19.3	1	0.47	6.12	1	0.141	3	This study
CA-SLO-239	Estimated Holocene berries	plant	-	-23.5	1.3	0.46	-2.4	1.8	0.08	-
CA-SMA-18	Northern fur seal (Callorhinus ursinus)	pinniped	collagen	-13.7572	0.873313	0.581	17.5153	1.54531	0.103	6	This study
CA-SMA-18	Sea otter (Enyhdra lutris)	sea otter	collagen	-11.3967	0.430674	0.581	15.0633	0.901237	0.103	6	This study
CA-SMA-18	Black-tailed deer (Odocoileus hemionus)	ruminant	collagen	-20.5888	0.86395	0.47	5	0.431691	0.141	5	This study
CA-SMA-18	Rabbit (Sylvilagus sp.), Botta's pocket gopher (Thomomys bottae), and woodrat (Neotoma fuscipes)	small mammal	collagen	-21.8212	0.5	0.47	4.1	0.9	0.14	16	This study
CA-SMA-18	Estimated Holocene berries	plant	-	-23.5	1.3	0.46	-2.4	1.8	0.08	-
CA-SMA-113	Surfperch (Embiotocidae) and Prickleback (Stichaeidae)	marine fish	collagen	-14.5853	1.14315	0.335344	12.8604	1.25527	0.115915	5	2 Embiotocidae, 3 Stichaeidae, this study
CA-SMA-113	Sea otter (Enyhdra lutris)	sea otter	collagen	-11.5544	1	0.581	13.86	1	0.103	2	This study
CA-SMA-113	Black-tailed deer (Odocoileus hemionus) and elk (Cervus canadensis)	ruminant	collagen	-20.8513	0.726198	0.47	4.8381	0.721054	0.141	10	8 O. hemionus, 2 C. canadensis, this study
CA-SMA-113	Rabbit (Sylvilagus sp.) and woodrat (Neotoma fuscipes)	small mammal	collagen	-22	0.8	0.47	4.3	1.3	0.14	21	This study
CA-SMA-113	Estimated Holocene berries	plant	-	-23.5	1.3	0.46	-2.4	1.8	0.08	-
CA-SMA-115	Northern fur seal (Callorhinus ursinus) and California sea lion (Zalophus californianus)	pinniped	collagen	-12.83	1.13102	0.581	18.62	2.83104	0.103	7	5 Callorhinus ursinus, 2 Zalophus californianus, this study
CA-SMA-115	Sea otter (Enyhdra lutris)	sea otter	collagen	-11.26	1.29761	0.581	16.34	1.90979	0.103	10	This study
CA-SMA-115	Black-tailed deer (Odocoileus hemionus)	ruminant	collagen	-21.0626	0.753983	0.47	5.17397	1.15171	0.141	9	9 O. hemionus, this study
CA-SMA-115	Botta's pocket gopher (Thomomys bottae)	gopher	collagen	-22.0511	0.0314517	0.47	3.83425	1.87074	0.14	2	This study
CA-SMA-115	Estimated Holocene berries	plant	-	-23.5	1.3	0.46	-2.4	1.8	0.08	-

## Sheet: Table S3
Supplementary Table 3. Stable carbon and nitrogen isotope results for coyote, bobcat, and gray fox scats from Año Nuevo (ANNU) and Younger Lagoon/Moore Creek (YLMC) as well as archaeological and historical coyote and grizzly bear specimens. The % marine and % terrestrial material found in fully dissected scats is also listed; we did not fully dissect the model-identified scats. In "Notes" we list…
Site	Time Period	ID	Species	Tissue	Year Collected*	δ13C	δ15N	Atomic C:N	% marine	% terrestrial	Month	Season	Notes
ANNU	modern	012712ANNU01	Canis latrans	scat	2012	-21.4464	12.1129	7.4376	0	0	January	Winter	hair-verified; no identifiable material
ANNU	modern	012712ANNU11	Canis latrans	scat	2012	-25.7535	7.27227	24.5659	0	100	January	Winter	DNA mixed; hair-verified
ANNU	modern	020313ANNU02	Canis latrans	scat	2013	-26.96	6.44	9.8	-	-	February	Winter	probability: 0.89
ANNU	modern	020313ANNU03	Canis latrans	scat	2013	-27.6576	12.8849	9.02337	0	100	February	Winter	DNA verified
ANNU	modern	020313ANNU09	Canis latrans	scat	2013	-26.0104	13.3176	9.17808	59	41	February	Winter	DNA verified
ANNU	modern	020313ANNU16	Canis latrans	scat	2013	-27.05	7.77	14.8	-	-	February	Winter	probability: 0.69
ANNU	modern	062412ANNU16	Canis latrans	scat	2012	-23.42	9.5	6.6	-	-	June	Summer	probability: 1.00
ANNU	modern	062412ANNU32	Canis latrans	scat	2012	-22.1934	17.9982	6.95177	43	57	June	Summer	DNA verified
ANNU	modern	062412ANNU34	Canis latrans	scat	2012	-19.6717	15.4843	9.09526	100	0	June	Summer	DNA verified
ANNU	modern	062412ANNU37	Canis latrans	scat	2012	-22.4267	15.3747	7.8489	76	24	June	Summer	hair-verified
ANNU	modern	080813ANNU08	Canis latrans	scat	2013	-27.83	6.37	7	-	-	August	Summer	probability: 0.94
ANNU	modern	091111AN003	Canis latrans	scat	2011	-26.4308	7.91363	8.52833	43	57	September	Fall	DNA verified
ANNU	modern	091111AN006	Canis latrans	scat	2011	-27.2425	7.27195	9.8	0	100	September	Fall	hair-verified
ANNU	modern	091111AN008	Canis latrans	scat	2011	-26.6461	6.72797	10.0415	0	100	September	Fall	DNA failed, hair-verified
ANNU	modern	091111AN0012	Canis latrans	scat	2011	-26.3722	5.42179	6.26545	0	100	September	Fall	hair-verified
ANNU	modern	091111AN0014	Canis latrans	scat	2011	-23.1475	13.3899	8.89439	68	32	September	Fall	DNA failed, hair-verified
ANNU	modern	091111AN0015	Canis latrans	scat	2011	-19.8304	17.1244	8.53074	100	0	September	Fall	DNA verified
ANNU	modern	102212ANNU19	Canis latrans	scat	2012	-27.2541	8.09185	17.9826	0	100	October	Fall	DNA verified
ANNU	modern	102212ANNU20	Canis latrans	scat	2012	-26.8054	4.68833	7.76016	0	100	October	Fall	DNA failed, hair-verified
ANNU	modern	102212ANNU24	Canis latrans	scat	2012	-26.7457	6.18869	7.49052	0	100	October	Fall	DNA verified
ANNU	modern	102212ANNU25	Canis latrans	scat	2012	-20.616	3.96643	5.69311	0	100	October	Fall	DNA verified
ANNU	modern	102212ANNU38	Canis latrans	scat	2012	-26.4	10.93	7.01	-	-	October	Fall	probability: 1.00
ANNU	modern	111411ANNU02	Canis latrans	scat	2011	-22.3424	8.7364	7.57049	0	100	November	Fall	DNA verified
ANNU	modern	111411ANNU03	Canis latrans	scat	2011	-22.6874	13.3163	12.1519	52	48	November	Fall	DNA verified
ANNU	modern	111411ANNU04	Canis latrans	scat	2011	-26.4507	8.92297	8.98594	0	100	November	Fall	DNA verified
ANNU	modern	111411ANNU07	Canis latrans	scat	2011	-22.4584	14.5937	11.1606	52	48	November	Fall	DNA verified
ANNU	modern	111411ANNU11	Canis latrans	scat	2011	-22.362	15.0601	8.1577	43	57	November	Fall	DNA verified
ANNU	modern	111411ANNU12	Canis latrans	scat	2011	-22.4864	13.5305	7.6726	10	90	November	Fall	DNA verified
ANNU	modern	111411ANNU16	Canis latrans	scat	2011	-25.1582	12.2917	8.62727	35	65	November	Fall	DNA verified
ANNU	modern	111411ANNU17	Canis latrans	scat	2011	-28.0278	11.0796	11.2956	0	100	November	Fall	DNA verified
ANNU	modern	AN009	Canis latrans	scat	2011	-27.2314	8.43857	8.29157	0	100	May	Spring	DNA verified
ANNU	modern	AN0015	Canis latrans	scat	2011	-27.0647	7.33673	7.50708	0	100	May	Spring	DNA verified
ANNU	modern	AN0019	Canis latrans	scat	2011	-25.3542	8.9518	8.0017	20	80	May	Spring	DNA verified
ANNU	modern	AN0020	Canis latrans	scat	2011	-27.5914	13.7954	9.04262	0	100	May	Spring	DNA verified
ANNU	modern	COY3	Canis latrans	bone collagen	2012	-22.2	13.9	3.2	NA	NA	NA	NA	Reid and Koch, 2017, PLoSONE
ANNU	modern	SPR1	Canis latrans	bone collagen	2013	-22	13.4	2.8	NA	NA	NA	NA	this study
YLMC	modern	012612YLMC09	Canis latrans	scat	2012	-26.8491	6.93626	9.94085	0	100	January	Winter	DNA verified
YLMC	modern	012612YLMC11	Canis latrans	scat	2012	-29.6205	9.87336	13.2124	0	100	January	Winter	DNA verified
YLMC	modern	012612YLMC12	Canis latrans	scat	2012	-27.31	8.13	12.4	-	-	January	Winter	probability: 0.69
YLMC	modern	012612YLMC17	Canis latrans	scat	2012	-20.0732	5.79088	13.4598	0	100	January	Winter	DNA verified
YLMC	modern	012612YLMC19	Canis latrans	scat	2012	-23.2398	7.01445	12.4191	0	100	January	Winter	DNA verified
YLMC	modern	012612YLMC22	Canis latrans	scat	2012	-29.0046	8.27606	10.5028	0	100	January	Winter	DNA verified
YLMC	modern	041412YLMC09	Canis latrans	scat	2012	-27.8159	7.94566	8.56081	0	100	April	Spring	DNA verified
YLMC	modern	041412YLMC10	Canis latrans	scat	2012	-23.33	5.84	8.1	-	-	April	Spring	probability: 0.65
YLMC	modern	041412YLMC12	Canis latrans	scat	2012	-28.6	7.34	8.2	-	-	April	Spring	probability: 0.95
YLMC	modern	041412YLMC14	Canis latrans	scat	2012	-25	6	8.6	-	-	April	Spring	probability: 0.75
YLMC	modern	041412YLMC15	Canis latrans	scat	2012	-29.5178	8.90591	8.77769	0	100	April	Spring	DNA verified
YLMC	modern	041412YLMC18	Canis latrans	scat	2012	-28.05	7.89	8	-	-	April	Spring	probability: 0.67
YLMC	modern	062612YLMC01	Canis latrans	scat	2012	-28.14	8.19	7.3	-	-	June	Summer	probability: 0.87
YLMC	modern	062612YLMC11	Canis latrans	scat	2012	-27.33	6.61	10.1	-	-	June	Summer	probability: 0.86
YLMC	modern	062612YLMC14	Canis latrans	scat	2012	-27.4893	5.49619	15.6381	0	100	June	Summer	DNA verified
YLMC	modern	081013YLMC06	Canis latrans	scat	2013	-27.02	8.06	8	-	-	August	Summer	probability: 0.66
YLMC	modern	081013YLMC08	Canis latrans	scat	2013	-29.27	4.47	21.3	-	-	August	Summer	probability: 0.82
YLMC	modern	091211MC1	Canis latrans	scat	2011	-27.5409	7.74317	8.22238	0	100	September	Fall	hair-verified
YLMC	modern	091211MC4	Canis latrans	scat	2011	-27.7206	7.89853	8.11192	0	100	September	Fall	hair-verified
YLMC	modern	091211MC5	Canis latrans	scat	2011	-28.8391	8.03153	10.9836	0	100	September	Fall	hair-verified
YLMC	modern	091211MC6	Canis latrans	scat	2011	-27.8953	6.93106	9.19271	0	100	September	Fall	hair-verified
YLMC	modern	102312YLMC11	Canis latrans	scat	2012	-28.17	7.13	11.5	-	-	October	Fall	probability: 0.85
YLMC	modern	102312YLMC12	Canis latrans	scat	2012	-25.6	8.26	8.2	-	-	October	Fall	probability: 0.61
YLMC	modern	102312YLMC19	Canis latrans	scat	2012	-29.12	6.82	12.7	-	-	October	Fall	probability: 0.98
YLMC	modern	102312YLMC34	Canis latrans	scat	2012	-28.2	6.79	10.8	-	-	October	Fall	probability: 0.85
YLMC	modern	111511YLMC08	Canis latrans	scat	2011	-26.8417	8.84485	7.95263	0	100	November	Fall	DNA verified
YLMC	modern	111511YLMC11	Canis latrans	scat	2011	-24.41	6.94	11.9	-	-	November	Fall	probability: 0.84
YLMC	modern	111511YLMC14	Canis latrans	scat	2011	-25.6822	7.22942	11.8124	0	100	November	Fall	DNA verified
YLMC	modern	COY1	Canis latrans	bone collagen	2012	-21.4	8.3	2.9	NA	NA	NA	NA	Reid and Koch, 2017, PLoSONE
YLMC	modern	COY2	Canis latrans	bone collagen	2012	-21.7	10.2	2.8	NA	NA	NA	NA	Reid and Koch, 2017, PLoSONE
ANNU	modern	012712ANNU03	Lynx rufus	scat	2012	-28.06	4.2	5.4	-	-	January	winter	DNA verified
ANNU	modern	012712ANNU04	Lynx rufus	scat	2012	-27.6	3.89	5.6	-	-	January	winter	DNA verified
ANNU	modern	012712ANNU07	Lynx rufus	scat	2012	-28.64	7.34	5.8	-	-	January	winter	DNA verified
ANNU	modern	012712ANNU15	Lynx rufus	scat	2012	-27.35	6.06	7.7	-	-	January	winter	DNA verified
ANNU	modern	020313ANNU01	Lynx rufus	scat	2013	-27.92	7.57	5.8	-	-	February	winter	DNA verified
ANNU	modern	020313ANNU04	Lynx rufus	scat	2013	-25.77	3.88	5.7	-	-	February	winter	DNA verified
ANNU	modern	020313ANNU10	Lynx rufus	scat	2013	-28.91	6.36	6	-	-	February	winter	DNA verified
ANNU	modern	020313ANNU12	Lynx rufus	scat	2013	-27.3	6.61	6.9	-	-	February	winter	DNA verified
ANNU	modern	020313ANNU15	Lynx rufus	scat	2013	-27.2	9.07	5.8	-	-	February	winter	DNA verified
ANNU	modern	041512ANNU02	Lynx rufus	scat	2012	-27.66	8.06	6.2	-	-	April	spring	DNA verified
ANNU	modern	041512ANNU11	Lynx rufus	scat	2012	-28.17	7.08	6.2	-	-	April	spring	DNA verified
ANNU	modern	041512ANNU16	Lynx rufus	scat	2012	-29.55	8.56	7	-	-	April	spring	DNA verified
ANNU	modern	041512ANNU20	Lynx rufus	scat	2012	-27.72	1.84	6.2	-	-	April	spring	DNA verified
ANNU	modern	050413ANNU01	Lynx rufus	scat	2013	-28.48	6.29	5.6	-	-	May	spring	DNA verified
ANNU	modern	050413ANNU02	Lynx rufus	scat	2013	-28.92	5.17	6.2	-	-	May	spring	DNA verified
ANNU	modern	050413ANNU06	Lynx rufus	scat	2013	-27.25	6.94	5.5	-	-	May	spring	DNA verified
ANNU	modern	050413ANNU07	Lynx rufus	scat	2013	-27.92	8.38	7.7	-	-	May	spring	DNA verified
ANNU	modern	050413ANNU08	Lynx rufus	scat	2013	-28.73	7.74	8.4	-	-	May	spring	DNA verified
ANNU	modern	050413ANNU10	Lynx rufus	scat	2013	-28.72	6.94	6.8	-	-	May	spring	DNA verified
ANNU	modern	050413ANNU12	Lynx rufus	scat	2013	-28	6.42	6.9	-	-	May	spring	DNA verified
ANNU	modern	050413ANNU14	Lynx rufus	scat	2013	-25.76	3.5	7.3	-	-	May	spring	DNA verified
ANNU	modern	050413ANNU16	Lynx rufus	scat	2013	-26.7	7.52	6	-	-	May	spring	DNA verified
ANNU	modern	062412ANNU01	Lynx rufus	scat	2012	-27.4	8.89	4.9	-	-	June	summer	DNA verified
ANNU	modern	062412ANNU22	Lynx rufus	scat	2012	-28.56	7.54	6.7	-	-	June	summer	DNA verified
ANNU	modern	062412ANNU26	Lynx rufus	scat	2012	-27.72	7.25	5	-	-	June	summer	DNA verified
ANNU	modern	062412ANNU30	Lynx rufus	scat	2012	-27.15	3.46	5.5	-	-	June	summer	DNA verified
ANNU	modern	080813ANNU07	Lynx rufus	scat	2013	-26.82	6.52	5.5	-	-	August	summer	DNA verified
ANNU	modern	080813ANNU09	Lynx rufus	scat	2013	-27.6918	6.70325	6.85915	-	-	August	summer	DNA verified
ANNU	modern	080813ANNU20	Lynx rufus	scat	2013	-29	7.63	7.2	-	-	August	summer	DNA verified
ANNU	modern	080813ANNU24	Lynx rufus	scat	2013	-28.84	3.79	7.5	-	-	August	summer	DNA verified
ANNU	modern	080813ANNU35	Lynx rufus	scat	2013	-27.84	5.36	6	-	-	August	summer	DNA verified
ANNU	modern	091111AN001	Lynx rufus	scat	2011	-27.5	5.87	7	-	-	September	fall	DNA verified
ANNU	modern	091111AN005	Lynx rufus	scat	2011	-26.83	5.97	7.4	-	-	September	fall	DNA verified
ANNU	modern	091111AN009	Lynx rufus	scat	2011	-26.81	6.91	7.7	-	-	September	fall	DNA verified
ANNU	modern	091111AN017	Lynx rufus	scat	2011	-27.81	5.24	8.4	-	-	September	fall	DNA verified
ANNU	modern	091111AN018	Lynx rufus	scat	2011	-27.79	2.62	7.7	-	-	September	fall	DNA verified
ANNU	modern	091111AN020	Lynx rufus	scat	2011	-28.15	5.87	8.5	-	-	September	fall	DNA verified
ANNU	modern	102212ANNU01	Lynx rufus	scat	2012	-27.44	7.96	5.7	-	-	October	fall	DNA verified
ANNU	modern	102212ANNU02	Lynx rufus	scat	2012	-27.65	5.79	8.6	-	-	October	fall	DNA verified
ANNU	modern	102212ANNU10	Lynx rufus	scat	2012	-24.55	4.31	7	-	-	October	fall	DNA verified
ANNU	modern	102212ANNU26	Lynx rufus	scat	2012	-28.29	5.98	6.7	-	-	October	fall	DNA verified
ANNU	modern	102212ANNU27	Lynx rufus	scat	2012	-28.02	6.86	7.8	-	-	October	fall	DNA verified
ANNU	modern	102212ANNU32	Lynx rufus	scat	2012	-27.52	5.84	7	-	-	October	fall	DNA verified
ANNU	modern	102212ANNU36	Lynx rufus	scat	2012	-26.79	6.21	7	-	-	October	fall	DNA verified
ANNU	modern	111411ANNU10	Lynx rufus	scat	2011	-26.72	6.06	6.6	-	-	November	fall	DNA verified
ANNU	modern	111411ANNU18	Lynx rufus	scat	2011	-27.45	4.87	6.6	-	-	November	fall	DNA verified
ANNU	modern	111411ANNU22	Lynx rufus	scat	2011	-25.16	6.65	7	-	-	November	fall	DNA verified
ANNU	modern	111411ANNU31	Lynx rufus	scat	2011	-27.92	6.85	6	-	-	November	fall	DNA verified
ANNU	modern	2AN0037	Lynx rufus	scat	2011	-27.6346	8.68753	6.01001	-	-	May	spring	DNA verified
ANNU	modern	2AN0043	Lynx rufus	scat	2011	-27.9676	7.37824	6.30863	-	-	May	spring	DNA verified
ANNU	modern	AN0001	Lynx rufus	scat	2011	-27.4798	5.78115	4.88567	-	-	May	spring	DNA verified
ANNU	modern	AN0003	Lynx rufus	scat	2011	-24.8306	4.15251	6.301	-	-	May	spring	DNA verified
ANNU	modern	AN0005	Lynx rufus	scat	2011	-27.4521	6.79522	5.31842	-	-	May	spring	DNA verified
YLMC	modern	012612YLMC16	Lynx rufus	scat	2012	-28.73	8.52	8.1	-	-	January	winter	DNA verified
YLMC	modern	041412YLMC03	Lynx rufus	scat	2012	-29.1154	8.71662	6.05369	-	-	April	spring	DNA verified
YLMC	modern	041412YLMC05	Lynx rufus	scat	2012	-29.854	10.316	7.47657	-	-	April	spring	DNA verified
YLMC	modern	041412YLMC23	Lynx rufus	scat	2012	-28.528	5.59009	7.83987	-	-	April	spring	DNA verified
YLMC	modern	062612YLMC05	Lynx rufus	scat	2012	-25.2269	5.08615	4.49523	-	-	June	summer	DNA verified
YLMC	modern	062612YLMC08	Lynx rufus	scat	2012	-27.9239	5.55923	10.3619	-	-	June	summer	DNA verified
YLMC	modern	062612YLMC10	Lynx rufus	scat	2012	-28.0573	5.36186	7.61956	-	-	June	summer	DNA verified
YLMC	modern	091211YL03	Lynx rufus	scat	2011	-27.95	7.28	5.8	-	-	September	fall	DNA verified
YLMC	modern	111511YLMC01	Lynx rufus	scat	2011	-27.72	11.27	6.1	-	-	November	fall	DNA verified
ANNU	modern	012712ANNU16	Urocyon cinereoargenteus	scat	2012	-25.79	7.83	20.5	-	-	January	winter	DNA verified
ANNU	modern	012712ANNU17	Urocyon cinereoargenteus	scat	2012	-25.71	8.47	18.1	-	-	January	winter	DNA verified
ANNU	modern	012712ANNU20	Urocyon cinereoargenteus	scat	2012	-25.18	10.1	15.5	-	-	January	winter	DNA verified
ANNU	modern	012712ANNU22	Urocyon cinereoargenteus	scat	2012	-25.73	9.72	18.9	-	-	January	winter	DNA verified
ANNU	modern	012712ANNU23	Urocyon cinereoargenteus	scat	2012	-26.17	8.07	19.9	-	-	January	winter	DNA verified
ANNU	modern	012712ANNU24	Urocyon cinereoargenteus	scat	2012	-26.88	6.7	7	-	-	January	winter	DNA verified
ANNU	modern	041512ANNU06	Urocyon cinereoargenteus	scat	2012	-26.58	8.17	18.9	-	-	April	spring	DNA verified
ANNU	modern	041512ANNU07	Urocyon cinereoargenteus	scat	2012	-28.17	5.88	7.7	-	-	April	spring	DNA verified
ANNU	modern	041512ANNU09	Urocyon cinereoargenteus	scat	2012	-27.37	4.9	6.6	-	-	April	spring	DNA verified
ANNU	modern	041512ANNU10	Urocyon cinereoargenteus	scat	2012	-26.99	5.87	9.2	-	-	April	spring	DNA verified
ANNU	modern	041512ANNU13	Urocyon cinereoargenteus	scat	2012	-25.94	7.56	7.7	-	-	April	spring	DNA verified
ANNU	modern	062412ANNU12	Urocyon cinereoargenteus	scat	2012	-28.47	6.39	10.1	-	-	June	summer	DNA verified
ANNU	modern	062412ANNU17	Urocyon cinereoargenteus	scat	2012	-28.04	6.51	7.2	-	-	June	summer	DNA verified
ANNU	modern	080813ANNU12	Urocyon cinereoargenteus	scat	2013	-28.67	3.9	12.3	-	-	August	summer	DNA verified
ANNU	modern	080813ANNU19	Urocyon cinereoargenteus	scat	2013	-28.56	5.32	10.6	-	-	August	summer	DNA verified
ANNU	modern	080813ANNU21	Urocyon cinereoargenteus	scat	2013	-27.57	5.87	5.7	-	-	August	summer	DNA verified
ANNU	modern	091111AN027	Urocyon cinereoargenteus	scat	2011	-26.99	8.26	8.8	-	-	September	fall	DNA verified
ANNU	modern	091111AN028	Urocyon cinereoargenteus	scat	2011	-27.27	3.9	19.1	-	-	September	fall	DNA verified
ANNU	modern	091111AN030	Urocyon cinereoargenteus	scat	2011	-28.9	4.05	23.6	-	-	September	fall	DNA verified
ANNU	modern	091111AN035	Urocyon cinereoargenteus	scat	2011	-28.92	5.23	13.2	-	-	September	fall	DNA verified
ANNU	modern	102212ANNU12	Urocyon cinereoargenteus	scat	2012	-28.97	5.56	6.3	-	-	October	fall	DNA verified
ANNU	modern	102212ANNU13	Urocyon cinereoargenteus	scat	2012	-27.33	6.73	9.2	-	-	October	fall	DNA verified
ANNU	modern	111411ANNU20	Urocyon cinereoargenteus	scat	2011	-26.74	4.51	8.1	-	-	November	fall	DNA verified
ANNU	modern	111411ANNU27	Urocyon cinereoargenteus	scat	2011	-27.79	5.63	6.7	-	-	November	fall	DNA verified
ANNU	modern	2AN0016	Urocyon cinereoargenteus	scat	2011	-27.4116	5.58162	9.09087	-	-	May	spring	DNA verified
ANNU	modern	2AN0024	Urocyon cinereoargenteus	scat	2011	-27.6231	6.18804	7.72954	-	-	May	spring	DNA verified
ANNU	modern	2AN0034	Urocyon cinereoargenteus	scat	2011	-27.9676	7.37824	6.30863	-	-	May	spring	DNA verified
Lake Co.	historical	CAS 20549	Canis latrans	bone collagen	1893	-20.0387	9.78137	3.3	NA	NA	NA	NA
Monterey Co.	historical	CAS 6431	Canis latrans	bone collagen	1894	-20.1565	9.91112	3.3	NA	NA	NA	NA
Kern Co.	historical	CAS 76	Canis latrans	bone collagen	1909	-18.7921	12.915	3.4	NA	NA	NA	NA
San Mateo Co.	historical	CAS 263	Canis latrans	hair	1908	-22.3737	8.44941	3.5	NA	NA	NA	NA
Santa Barbara Co.	historical	CAS 92	Canis latrans	hair	1909	-19.7916	7.74377	3.5	NA	NA	NA	NA
Santa Barbara Co.	historical	CAS 120	Canis latrans	hair	1909	-20.037	9.01451	3.6	NA	NA	NA	NA
Mendocino Co.	historical	CAS 165	Canis latrans	hair	1910	-20.6912	5.88356	3.5	NA	NA	NA	NA
Santa Cruz Co.	historical	CAS 928	Canis latrans	hair	1913	-21.2283	7.21294	3.5	NA	NA	NA	NA
Contra Costa Co.	historical	CAS 955	Canis latrans	hair	1914	-21.571	7.73611	3.5	NA	NA	NA	NA
Humboldt Co.	historical	CAS 1328	Canis latrans	hair	1916	-21.8636	8.46754	3.6	NA	NA	NA	NA
Humboldt Co.	historical	CAS 1329	Canis latrans	hair	1916	-21.8645	8.4867	3.7	NA	NA	NA	NA
Alameda Co.	historical	CAS 1128	Canis latrans	hair	1916	-21.5228	7.8846	3.6	NA	NA	NA	NA
Monterey Co.	historical	CAS 8115	Canis latrans	bone collagen	1939	-22.0167	6.9337	3.5	NA	NA	NA	NA
Santa Cruz Co.	historical	CAS 12633	Canis latrans	bone collagen	1961	-19.4984	6.9085	3.3	NA	NA	NA	NA
Marin Co.	historical	CAS 21220	Canis latrans	bone collagen	1978	-21.5314	7.84305	3.2	NA	NA	NA	NA
Solano Co.	historical	CAS 23923	Canis latrans	bone collagen	1991	-21.7835	12.2024	4	NA	NA	NA	NA
Santa Barbara Co.	historical	CAS 129	Ursus arctos	bone collagen	1909	-18.1776	4.58749	3.3	NA	NA	NA	NA
Monterey Co.	historical	CAS 5567	Ursus arctos	bone collagen	unknown	-18.6743	6.203	3.3	NA	NA	NA	NA
Santa Clara Co.	historical	CAS 9377	Ursus arctos	bone collagen	1948	-21.3818	3.72097	3.3	NA	NA	NA	NA
San Francisco Co.	historical	CAS 24360	Ursus arctos	bone collagen	1999	-16.9599	14.0115	3.2	NA	NA	NA	NA
San Francisco Co.	historical	CAS 27342	Ursus arctos	bone collagen	1973	-18.4971	9.63169	3.2	NA	NA	NA	NA
SCR-35	archaeological	100213	Canis latrans	bone collagen	NA	-19.329	9.14302	3.4	NA	NA	NA	NA
SCR-35	archaeological	101882	Canis latrans	bone collagen	NA	-20.0866	9.81358	3.3	NA	NA	NA	NA
SCR-35	archaeological	101892	Ursus arctos	bone collagen	NA	-20.5	5.5	3.4	NA	NA	NA	NA
MNT-234	archaeological	3406	Canis latrans	bone collagen	NA	-20.171	5.722	3.449	NA	NA	NA	NA
MNT-234	archaeological	1697	Canis latrans	bone collagen	NA	-19.971	6.061	3.25598	NA	NA	NA	NA
MNT-234	archaeological	1817	Canis latrans	bone collagen	NA	-19.772	6.192	3.26514	NA	NA	NA	NA
MNT-234	archaeological	1761	Canis latrans	bone collagen	NA	-20.25	7.514	3.30791	NA	NA	NA	NA
MNT-234	archaeological	1701	Canis latrans	bone collagen	NA	-18.771	4.036	3.30257	NA	NA	NA	NA
MNT-234	archaeological	3411	Canis latrans	bone collagen	NA	-20.284	7.164	3.23829	NA	NA	NA	NA
MNT-234	archaeological	1891	Canis latrans	bone collagen	NA	-18.016	9.903	3.30415	NA	NA	NA	NA
MNT-234	archaeological	1200	Canis latrans	bone collagen	NA	-19.02	5.638	3.16886	NA	NA	NA	NA
MNT-234	archaeological	1699	Canis latrans	bone collagen	NA	-18.697	7.479	3.30009	NA	NA	NA	NA
MNT-234	archaeological	3409	Canis latrans	bone collagen	NA	-19.141	4.933	3.39289	NA	NA	NA	NA
MNT-234	archaeological	1836	Canis latrans	bone collagen	NA	-19.47	6.667	3.27679	NA	NA	NA	NA
MNT-234	archaeological	1703	Canis latrans	bone collagen	NA	-19.755	6.171	3.31277	NA	NA	NA	NA
MNT-229	archaeological	836	Canis latrans	bone collagen	NA	-19.4331	6.72138	3.3	NA	NA	NA	NA
MNT-229	archaeological	856	Canis latrans	bone collagen	NA	-19.3215	6.67093	3.3	NA	NA	NA	NA
MNT-229	archaeological	1272	Canis latrans	bone collagen	NA	-20.2451	7.73421	3.4	NA	NA	NA	NA
MNT-229	archaeological	1222	Canis latrans	bone collagen	NA	-22.6526	7.5178	3.4	NA	NA	NA	NA
MNT-229	archaeological	1242	Ursus arctos	bone collagen	NA	-12.82	17.96	3.2	NA	NA	NA	NA
MNT-229	archaeological	819	Lynx rufus	bone collagen	NA	-20.0817	6.89242	3.21606	NA	NA	NA	NA
MNT-229	archaeological	1151	Lynx rufus	bone collagen	NA	-21.4736	10.6626	3.34105	NA	NA	NA	NA
MNT-229	archaeological	1241	Lynx rufus	bone collagen	NA	-20.9612	6.80917	3.40974	NA	NA	NA	NA
MNT-229	archaeological	1317	Lynx rufus	bone collagen	NA	-20.9794	6.40069	3.16702	NA	NA	NA	NA
MNT-229	archaeological	2009	Lynx rufus	bone collagen	NA	-20.1837	7.40165	3.50685	NA	NA	NA	NA
MNT-229	archaeological	3603	Lynx rufus	bone collagen	NA	-20.1154	7.12301	3.37017	NA	NA	NA	NA
MNT-229	archaeological	698	Puma concolor	bone collagen	NA	-12.5	15.2	3.4	NA	NA	NA	NA
SLO-239	archaeological	16A	Canis latrans	bone collagen	NA	-19.4793	6.39741	3.14819	NA	NA	NA	NA
SLO-239	archaeological	46	Canis latrans	bone collagen	NA	-16.9489	9.53354	3.12632	NA	NA	NA	NA
SLO-239	archaeological	15	Canis latrans	bone collagen	NA	-19.1051	7.7494	3.19152	NA	NA	NA	NA
SLO-239	archaeological	16B	Canis latrans	bone collagen	NA	-19.5978	6.47317	3.1518	NA	NA	NA	NA
SLO-5	archaeological	1-17d	Canis latrans	bone collagen	NA	-19.01	7.32	3.2	NA	NA	NA	NA
SMA-18	archaeological	E030-024	Canis latrans	bone collagen	NA	-19.756	8.23059	3.2	NA	NA	NA	NA
SMA-18	archaeological	E144-009	Canis latrans	bone collagen	NA	-19.8827	7.87609	3.2	NA	NA	NA	NA
SMA-113	archaeological	1259	Canis latrans	bone collagen	NA	-20.279	7.93528	3.5	NA	NA	NA	NA
SMA-113	archaeological	2979	Lynx rufus	bone collagen	NA	-17.2	12.8	3.3	NA	NA	NA	NA
SMA-115	archaeological	2389	Puma concolor	bone collagen	NA	-21.66	5.2	3.3	NA	NA	NA	NA
SMA-115	archaeological	142	Canis latrans	bone collagen	NA	-21.4	4.87	3.2	NA	NA	NA	NA
SMA-115	archaeological	109	Canis latrans	bone collagen	NA	-17.95	7.85	3.2	NA	NA	NA	NA
*Year Collected reflects the year in which a sample was acquired and does not necessarily correspond with the absolute age of the sample; several grizzly bear samples were collected post-grizzly extirpation.

## Sheet: Table S4
Supplementary Table 4. Isotope mixing model results for modern and subfossil coyote diets. Modern results are derived from 35 Año Nuevo coyote scats and 33 Younger Lagoon/Moore Creek coyote scats.
Site	MIXsiar model parameters	Source	Mean	0.025	0.975	Range
Modern Año Nuevo	normal; error structure: Resid * Process; informative prior a = (0.3, 0.5, 1.4, 0.3, 2.7, 0.9)	anthropogenic resources	0.03	0	0.16	0.16
		California mouse (Peromyscus californicus)	0.091	0	0.412	0.412
		marine resources	0.223	0.043	0.343	0.3
		plants	0.155	0.023	0.337	0.314
		terrestrial herbivores	0.311	0.086	0.543	0.457
		terrestrial omnivores	0.189	0.015	0.439	0.424
Modern Younger Lagoon/ Moore Creek	normal; error structure: Resid * Process	anthropogenic resources	0.04	0.001	0.11	0.109
		brush mouse (Peromyscus maniculatus)	0.19	0.012	0.416	0.404
		California mouse (Peromyscus californicus)	0.09	0.001	0.224	0.223
		marine resources	0.04	0.002	0.089	0.087
		plants	0.15	0.01	0.309	0.299
		terrestrial herbivores	0.2	0.015	0.449	0.434
		terrestrial omnivores	0.11	0.008	0.234	0.226
		vole (Microtus californicus)	0.19	0.006	0.424	0.418
CA-SCR-35	normal; error structure: Resid * Process	pinniped	0.14	0.01	0.31	0.3
		ruminant	0.25	0.01	0.66	0.65
		rabbit	0.24	0.01	0.62	0.61
		gopher	0.21	0.01	0.58	0.57
		plant	0.16	0.01	0.45	0.44
Moss Landing (CA-MNT-229 and CA-MNT-234)	normal; error structure: Resid * Process	marine fish	0.07	0	0.19	0.19
		pinniped	0.06	0	0.17	0.17
		small mammal	0.2	0.01	0.53	0.52
		ruminant	0.26	0.02	0.59	0.57
		plant	0.41	0.16	0.63	0.47
CA-SLO-239	very long; error structure: Resid * Process	sea otter	0.02	0	0.05	0.05
		ruminant	0.69	0.43	0.94	0.51
		plant	0.29	0.05	0.55	0.5
CA-SMA-18	normal; error structure: Resid * Process	pinniped	0.065	0.0025	0.1935	0.191
		sea otter	0.0265	0.0015	0.0755	0.074
		ruminant	0.3245	0.012	0.806	0.794
		small mammal	0.3665	0.013	0.827	0.814
		plant	0.2175	0.0095	0.638	0.6285
CA-SMA-113	normal; error structure: Process only (N = 1)	marine fish	0.1	0.004	0.28	0.276
		sea otter	0.04	0.002	0.113	0.111
		ruminant	0.26	0.011	0.703	0.692
		small mammal	0.305	0.015	0.733	0.718
		plant	0.293	0.019	0.654	0.635
CA-SMA-115	long; error structure: Resid * Process	pinniped	0.096	0.004	0.279	0.275
		sea otter	0.049	0.001	0.707	0.706
		ruminant	0.258	0.008	0.69	0.682
		gopher	0.276	0.011	0.728	0.717
		plant	0.321	0.016	0.707	0.691

## Sheet: Table S6
Supplementary Table 6. Scat deposition rates at each site in scats/km/day. We initially collected scat about 10 days after clearing, but shortened this time period to 7 days with some variation depending on scheduling.
Site	Transect length (km)	2011-05-01	2011-09-01	2011-11-01	2012-01-01	2012-04-01	2012-06-01	2012-10-01	2013-01-01	2013-05-01	2013-08-01	Mean
Año Nuevo	6	0.68	0.63	0.5	0.45	0.5	0.88	0.9	0.48	0.38	1.14	0.65
Younger Lagoon/Moore Creek	4	-	0.33	0.45	0.78	0.86	0.57	0.88	0.41	0.46	0.43	0.57
